# Supplementary material for: Endothelial Progenitor Cell Migration‐Enhancing Factors in the Secretome of Placental‐Derived Mesenchymal Stem Cells
Source: Hindawi journal article supplement (doi:10.1155/2016/2514326), 2016-01-01
Supplement: f1 [file 2514326.f1.pdf]

## Supplementary information

### Supplementary figure 1:

The amounts of total proteins and peptides presented in each subfraction of the 100kDa fraction of PL-MSC conditioned medium as determined by measuring an absorbance at 280 nm (to detect proteins containing aromatic ring) and 220 nm (to detect peptides)

**Column: C18**

**Eluent: 10-100% Acetonitrile (ACN)**

**Flow rate: 1 mL/min**

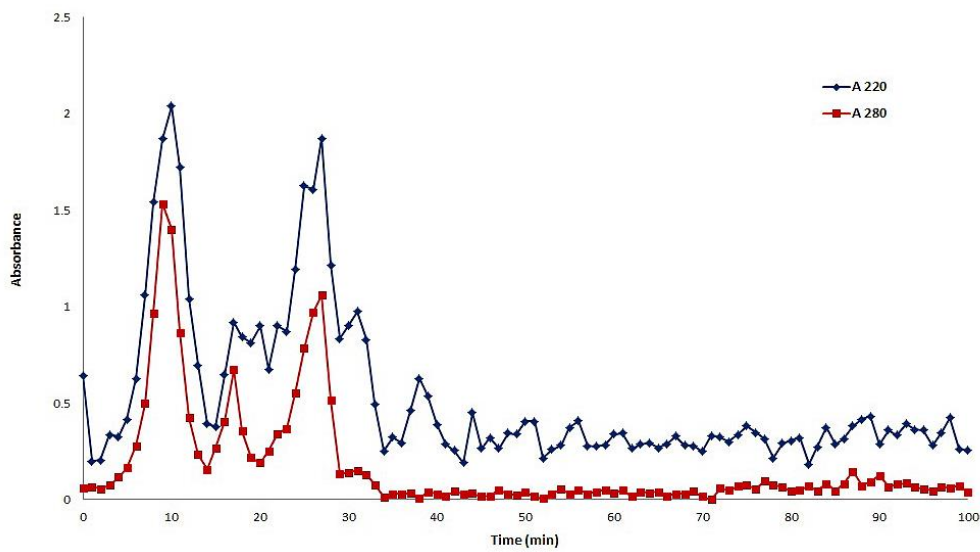

**Supplementary table 1: List of 77 secreted proteins identified in PL-MSC secretome**

| Protein name                                                                                                                                                                | Accession number | SignalP | SecretomeP | PANTHER classification                       |
|-----------------------------------------------------------------------------------------------------------------------------------------------------------------------------|------------------|---------|------------|----------------------------------------------|
| Astrotactin-1                                                                                                                                                               | gi 46488923      | Yes     |            | Cell junction protein                        |
| Heparan-sulfate 6-O-sulfotransferase 2 isoform L                                                                                                                            | gi 116295256     |         | Yes        | Transferase                                  |
| Motile sperm domain-containing protein 1                                                                                                                                    | gi 9506543       |         | Yes        | -                                            |
| Phospholipid-transporting ATPase IB                                                                                                                                         | gi 117168245     |         | Yes        | Hydrolase<br>Transporter                     |
| Polyamine-modulated factor 1 isoform 3                                                                                                                                      | gi 313851053     |         | Yes        | -                                            |
| RCSD1 protein                                                                                                                                                               | gi 48735391      |         | Yes        | Cytoskeletal protein                         |
| SLIT-ROBO Rho GTPase activating protein 2                                                                                                                                   | gi 55662261      |         | Yes        | -                                            |
| A type IV collagen                                                                                                                                                          | gi 15991848      | Yes     |            | Extracellular matrix                         |
| ADAM metalloproteinase with thrombospondin type 1 motif                                                                                                                     | gi 119631213     | Yes     |            | Protease                                     |
| Antigen MLAA-21                                                                                                                                                             | gi 37574654      |         | Yes        | Cell junction protein<br>G-protein modulator |
| Apical protein 2, isoform CRA_a                                                                                                                                             | gi 119582714     |         | Yes        | -                                            |
| Arylsulfatase D precursor                                                                                                                                                   | gi 71852584      | Yes     |            | Hydrolase                                    |
| B-cell CLL/lymphoma 7 protein family member B isoform 2                                                                                                                     | gi 308522773     |         | Yes        | -                                            |
| C1q and tumor necrosis factor related protein 3 variant                                                                                                                     | gi 62088102      |         | Yes        | -                                            |
| C3 and PZP-like alpha-2-macroglobulin domain containing 8                                                                                                                   | gi 23379807      | Yes     |            | Signaling molecule                           |
| CD95 ligand (Tumor necrosis factor)                                                                                                                                         | gi 61658441      |         | Yes        | -                                            |
| Chain A, Crystal Structure Of The Mammalian Copii-coat Protein Sec23/24 Bound To The Transport Signal Sequence Of Membrin                                                   | gi 209870512     |         | Yes        | G-protein modulator                          |
| Chain A, Crystallographic And Kinetic Studies Of Human Mitochondrial Acetoacetyl-coa Thiolase (t2): The Importance Of Potassium And Chloride For Its Structure And Function | gi 145579614     |         | Yes        | Acetyltransferase                            |
| Chain A, Hr1b Domain From Prk1                                                                                                                                              | gi 159163170     |         | Yes        | Kinase<br>Carrier protein                    |
| Chain A, Solution Structure Of The Death Domain Of Ankyrin-1                                                                                                                | gi 171848938     |         | Yes        | Cytoskeletal protein                         |
| Chain A, The Three-Dimensional Structure Of The C-Terminal Dna Binding Domain Of Human Ku70                                                                                 | gi 15988053      |         | Yes        | Nucleic acid binding                         |
| Chain A, X-Ray Structure Of Human Phosphomannomutase 2 (Pmm2)                                                                                                               | gi 75766280      |         | Yes        | Isomerase                                    |
| Chain B, Crystal Structure Of The Human Taf4-Taf12 (Tafii135-Tafii20) Complex                                                                                               | gi 24158663      |         | Yes        | -                                            |
| Chaperonin containing TCP1, subunit 4 (delta), isoform CRA_a                                                                                                                | gi 119620390     |         | Yes        | Nucleotide binding                           |
| Chondroitin sulfate synthase 1 precursor                                                                                                                                    | gi 31542309      | Yes     |            | Glycosyltransferase                          |

**Supplementary table 1: List of 77 secreted proteins identified in PL-MSC secretome (cont.)**

| Protein name                                                           | Accession number | SignalP | SecretomeP | PANTHER classification                       |
|------------------------------------------------------------------------|------------------|---------|------------|----------------------------------------------|
| Coiled-coil domain containing 78, isoform CRA_f                        | gi 119606147     |         | Yes        | -                                            |
| Cystine/glutamate transporter                                          | gi 7657683       |         | Yes        | Amino acid transporter                       |
| DEC-205/DCL-1 fusion protein variant V34-2                             | gi 32307817      | Yes     |            | Receptor                                     |
| Delta-like protein 1 precursor                                         | gi 110735443     | Yes     |            | Cell signaling                               |
| Down syndrome cell adhesion molecule isoform CHD2-42 precursor variant | gi 62087852      | Yes     |            | -                                            |
| EP3-V                                                                  | gi 2114191       |         | Yes        | G-protein coupled receptor                   |
| ERI1 exoribonuclease 3 isoform 1                                       | gi 74136559      |         | Yes        | Hydrolase                                    |
| General transcription factor IIF, polypeptide 1, 74kDa, isoform CRA_b  | gi 119589505     |         | Yes        | Transcription factor binding                 |
| HEATR1 protein                                                         | gi 15080480      |         | Yes        | -                                            |
| Histidine triad nucleotide binding protein 2, isoform CRA_c            | gi 119578737     |         | Yes        | -                                            |
| Hkir2.2x                                                               | gi 48474202      |         | Yes        | Ion transport                                |
| Ig kappa chain V-III region (Sca) - human (fragment)                   | gi 106611        |         | Yes        | -                                            |
| Immunoglobulin gamma 2 heavy chain variable region                     | gi 304562513     |         | Yes        | -                                            |
| Immunoglobulin kappa light chain variable region                       | gi 116795057     |         | Yes        | -                                            |
| Immunoglobulin lambda chain variable region                            | gi 587390        |         | Yes        | -                                            |
| Immunoglobulin light chain variable region                             | gi 13549148      |         | Yes        | -                                            |
| Immunoglobulin variable region                                         | gi 323431845     |         | Yes        | -                                            |
| KIAA0391                                                               | gi 27882031      |         | Yes        | -                                            |
| KIAA0976 protein                                                       | gi 40789006      |         | Yes        | Receptor/ ECM linker protein                 |
| KIF6 protein                                                           | gi 109658866     |         | Yes        | Cytoskeletal protein                         |
| Laminin, beta 3, isoform CRA_a                                         | gi 119613854     | Yes     |            | ECM linker protein                           |
| LDLR-FUT fusion protein                                                | gi 6739500       | Yes     |            | -                                            |
| Leprecan-like 2, isoform CRA_c                                         | gi 119609139     |         | Yes        | Extracellular matrix organization            |
| MHC class II antigen                                                   | gi 84796223      | Yes     |            | Immunity                                     |
| MSTP018 (Integrin alpha-11)                                            | gi 17432223      |         | Yes        | Cell adhesion/Receptor                       |
| Mutant CD8 alpha antigen                                               | gi 14861040      | Yes     |            | Defense/immunity protein                     |
| Nebulette                                                              | gi 3660517       |         | Yes        | -                                            |
| NK1 transcription factor-related protein 2                             | gi 226437602     |         | Yes        | Nucleic acid binding<br>Transcription factor |

**Supplementary table 1: List of 77 secreted proteins identified in PL-MSC secretome (cont.)**

| Protein name                                                                                    | Accession number | SignalP | SecretomeP | PANTHER classification                     |
|-------------------------------------------------------------------------------------------------|------------------|---------|------------|--------------------------------------------|
| Phosphodiesterase isozyme 7                                                                     | gi 30421104      |         | Yes        | Signal transduction                        |
| PILR alpha-associated neural protein isoform a precursor                                        | gi 24308547      | Yes     |            | Immunity molecule                          |
| Plasminogen                                                                                     | gi 38051823      | Yes     |            | Peptide hormone/receptor/serine proteinase |
| Pyruvate dehydrogenase phosphatase regulatory subunit                                           | gi 152013038     |         | Yes        | Oxidoreductase                             |
| RecName: Full=Zinc finger and BTB domain-containing protein 44                                  | gi 74760158      |         | Yes        | Transcription cofactors                    |
| SEMA6C protein                                                                                  | gi 92058719      | Yes     |            | Signaling molecule                         |
| Semaphorin receptor                                                                             | gi 6010211       | Yes     |            | Receptor                                   |
| Serpin peptidase inhibitor, clade D (heparin cofactor)                                          | gi 23273330      | Yes     |            | Hydrolase activity                         |
| Serum amyloid A protein beta des-Arg(pI5.6), SAA1 beta des-Arg pI5.6                            | gi 247142        |         | Yes        | -                                          |
| SETMAR protein, partial                                                                         | gi 33869529      |         | Yes        | DNA binding                                |
| Seven transmembrane helix receptor                                                              | gi 21928448      |         | Yes        | -                                          |
| Small inducible cytokine subfamily E, member 1 (endothelial monocyte-activating), isoform CRA_a | gi 119626608     |         | Yes        | Cytokine activity                          |
| Solute carrier family 6, member 15, isoform CRA_a                                               | gi 119617794     |         | Yes        | Ion transport                              |
| Sushi domain-containing protein 2 precursor                                                     | gi 10092665      | Yes     |            | Immunity/cytokine                          |
| Synaptotagmin-10                                                                                | gi 39752671      |         | Yes        | Membrane trafficking regulatory protein    |
| Syntaxin 16                                                                                     | gi 2961087       |         | Yes        | Membrane trafficking regulatory protein    |
| TAF15                                                                                           | gi 1373378       |         | Yes        | -                                          |
| TBC1 domain family, member 7 variant                                                            | gi 62898451      |         | Yes        | -                                          |
| Tumor necrosis factor receptor superfamily member 8 isoform 1 precursor                         | gi 597709795     | Yes     |            | Receptor                                   |
| Ubiquitously transcribed tetratricopeptide repeat protein Y-linked transcript variant 283       | gi 151946833     |         | Yes        | Transcription factor                       |
| Ubiquitously transcribed tetratricopeptide repeat protein Y-linked transcript variant 4         | gi 148733168     |         | Yes        | Transcription factor                       |
| Voltage-gated calcium channel alpha(2)delta-4 subunit                                           | gi 22770594      |         | Yes        | Calcium-binding protein                    |
| WD repeat domain 35                                                                             | gi 22477171      |         | Yes        | -                                          |
| Zinc finger protein 449                                                                         | gi 194239638     |         | Yes        | Nucleic acid binding                       |
